# Supplementary material for: Genome sequence of Pedobacter glucosidilyticus DD6b, isolated from zooplankton Daphnia magna
Source: PubMed Central journal article supplement (PMC4642753; doi:10.1186/s40793-015-0086-x), 2015-11-11
Supplement: 40793_2015_86_MOESM1_ESM.pdf [file 40793_2015_86_MOESM1_ESM.pdf]

## Associated MIGS Record

**Table S1.** Associated MIGS record, *P. glucosidilyticus* DD6b

| MIGS-ID        | field name                                 | description                                     |
|----------------|--------------------------------------------|-------------------------------------------------|
| <b>MIGS-1</b>  | Submit to INSDC/Trace archives             |                                                 |
| 1.1            | PID                                        | 246159                                          |
| 1.2            | Trace Archive                              | SRR1693843                                      |
| <b>MIGS-2</b>  | MIGS CHECK LIST TYPE                       |                                                 |
| <b>MIGS-3</b>  | Project Name                               | <i>Pedobacter glucosidilyticus</i> DD6b         |
| <b>MIGS-4</b>  | Geographic Location                        | Constance, Germany                              |
| 4.1            | Latitude                                   | 47.689081                                       |
| 4.2            | Longitude                                  | 9.187099                                        |
| 4.3            | Depth                                      | Not reported                                    |
| 4.4            | Altitude                                   | Not reported                                    |
| <b>MIGS-5</b>  | Time of Sample collection                  | October, 2008                                   |
| <b>MIGS-6</b>  | Habitat (EnvO)                             | Gut of <i>D. magna</i> [1]                      |
| 6.1            | temperature                                | 15-28°C                                         |
| 6.2            | pH                                         | 7.0                                             |
| 6.3            | salinity                                   | Non-halophile, 0.2 to 0.5g.L <sup>-1</sup> NaCl |
| 6.4            | chlorophyll                                | Not reported                                    |
| 6.5            | conductivity                               | Not reported                                    |
| 6.6            | light intensity                            | Not reported                                    |
| 6.7            | dissolved organic carbon (DOC)             | Not reported                                    |
| 6.8            | current                                    | Not reported                                    |
| 6.9            | atmospheric data                           | Not reported                                    |
| 6.10           | density                                    | Not reported                                    |
| 6.11           | alkalinity                                 | Not reported                                    |
| 6.12           | dissolved oxygen                           | Not reported                                    |
| 6.13           | particulate organic carbon (POC)           | Not reported                                    |
| 6.14           | phosphate                                  | 0.1-1mM; up to 30mM                             |
| 6.15           | nitrate                                    | Not reported                                    |
| 6.16           | sulfates                                   | Not reported                                    |
| 6.17           | sulfides                                   | Not reported                                    |
| 6.18           | primary production                         | Not reported                                    |
| <b>MIGS-7</b>  | Subspecific genetic lineage                |                                                 |
| <b>MIGS-9</b>  | Number of replicons                        |                                                 |
| <b>MIGS-10</b> | Extrachromosomal elements                  |                                                 |
| <b>MIGS-11</b> | Estimated Size                             |                                                 |
| <b>MIGS-12</b> | Reference for biomaterial or Genome report |                                                 |
| <b>MIGS-13</b> | Source material identifiers                |                                                 |
| <b>MIGS-14</b> | Known Pathogenicity                        | Not reported                                    |
| <b>MIGS-15</b> | Biotic Relationship                        | Not reported                                    |
| <b>MIGS-16</b> | Specific Host                              | <i>D. magna</i>                                 |
| <b>MIGS-17</b> | Host specificity or range (taxid)          |                                                 |
| <b>MIGS-18</b> | Health status of Host                      | Healthy                                         |
| <b>MIGS-19</b> | Trophic Level                              |                                                 |
| <b>MIGS-22</b> | Relationship to Oxygen                     | Aerobe                                          |
| <b>MIGS-23</b> | Isolation and Growth conditions            | [1,2], IDA                                      |
| <b>MIGS-27</b> | Nucleic acid preparation                   |                                                 |
|                |                                            | Illumina paired-end library; Nextera XT         |
| <b>MIGS-28</b> | Library construction                       |                                                 |
| 28.1           | Library size                               | Illumina: 1 kb                                  |
| 28.2           | Number of reads                            | 12.380.618                                      |

|                |                         |                                                                                                                     |
|----------------|-------------------------|---------------------------------------------------------------------------------------------------------------------|
| <b>28.3</b>    | vector                  |                                                                                                                     |
| <b>MIGS-29</b> | Sequencing method       | Illumina GAI                                                                                                        |
| <b>MIGS-30</b> | Assembly                |                                                                                                                     |
| <b>30.1</b>    | Assembly method         | SPAdes                                                                                                              |
| <b>30.2</b>    | estimated error rate    |                                                                                                                     |
| <b>30.3</b>    | method of calculation   |                                                                                                                     |
| <b>MIGS-31</b> | Finishing strategy      |                                                                                                                     |
| <b>31.1</b>    | Status                  | Improved high quality draft                                                                                         |
| <b>31.2</b>    | coverage                | 120                                                                                                                 |
| <b>31.3</b>    | contigs                 | 93                                                                                                                  |
| <b>MIGS-32</b> | Relevant SOPs           |                                                                                                                     |
|                | Gene calling method     | prodigal                                                                                                            |
|                | INSDC ID                | JMTN00000000                                                                                                        |
|                | NCBI project ID         | 246159                                                                                                              |
|                | Database: IMG           | 2590828803                                                                                                          |
|                | Genbank Date of Release | 08 <sup>th</sup> Dec, 2014                                                                                          |
|                | GOLD ID                 | Gp0043583                                                                                                           |
|                |                         | Data, GenBank                                                                                                       |
|                |                         | ( <a href="http://www.ncbi.nlm.nih.gov/nucore/JMTN00000000.1">http://www.ncbi.nlm.nih.gov/nucore/JMTN000000.1</a> ) |
| <b>MIGS-33</b> | Relevant e-resources    |                                                                                                                     |
