# Supplementary material for: Genome sequence of Pedobacter glucosidilyticus DD6b, isolated from zooplankton Daphnia magna
Source: PubMed Central journal article supplement (PMC4642753; doi:10.1186/s40793-015-0086-x), 2015-11-11
Supplement: 40793_2015_86_MOESM3_ESM.pdf [file 40793_2015_86_MOESM3_ESM.pdf]

**Supplementary Table S3:** Comparison of the genome properties of *P. glucodililyticus* DD6b with all completely sequenced type strains belonging to genus *Pedobacter*, as on 05-th of December 2014.

| Genome Name          | <i>P. agri</i> PB92 | <i>P. borealis</i> DSM 19626 | <i>P. glucosidilyticus</i> DD6b | <i>P. glucosidilyticus</i> DSM 23534 | <i>P. heparinus</i> HIM 762-3, DSM 2366 | <i>P. oryzae</i> DSM 19973 |
|----------------------|---------------------|------------------------------|---------------------------------|--------------------------------------|-----------------------------------------|----------------------------|
| GenBank Project ID   | PRJNA84275          | PRJNA236461                  | PRJNA246159                     | PRJNA188803                          | PRJNA27949                              | PRJNA185613                |
| IMG Genome ID        | 2548876984          | 2585427687                   | 2590828803                      | 2523533576                           | 644736398                               | 2523231054                 |
| GenBank Accession    | AJLG000000000       | J AUG000000000               | JMTN000000000                   | AULF000000000                        | CP001681                                | AUHA000000000              |
| Genome Size          | 5141552             | 5544917                      | 3872381                         | 4021020                              | 5167383                                 | 3445768                    |
| Gene Count           | 5188                | 5008                         | 3352                            | 3524                                 | 4339                                    | 3122                       |
| Coding Base Count %  | 87.71               | 85.13                        | 90.65                           | 90.54                                | 93.36                                   | 90.92                      |
| GC                   | .38                 | .38                          | .35                             | .34                                  | .42                                     | .38                        |
| COG Count            | 2182                | 2391                         | 1910                            | 1913                                 | 2320                                    | 1784                       |
| COG %                | 42.06               | 47.74                        | 56.98                           | 54.28                                | 53.47                                   | 57.14                      |
| KEGG Count           | 788                 | 866                          | 823                             | 812                                  | 879                                     | 760                        |
| KEGG %               | 15.19               | 17.29                        | 24.55                           | 23.04                                | 20.26                                   | 24.34                      |
| KOG Count            | 639                 | 717                          | 641                             | 636                                  | 760                                     | 633                        |
| KOG %                | 12.32               | 14.32                        | 19.02                           | 18.05                                | 17.52                                   | 20.28                      |
| Pfam Count           | 3559                | 3549                         | 2646                            | 2749                                 | 3458                                    | 2435                       |
| Pfam %               | 68.6                | 70.87                        | 78.94                           | 78.01                                | 79.7                                    | 77.99                      |
| TIGRfam Count        | 1091                | 1119                         | 1005                            | 1025                                 | 1156                                    | 917                        |
| TIGRfam %            | 34.36               | 22.34                        | 29.98                           | 29.09                                | 26.64                                   | 29.37                      |
| Signal Peptide Count | 658                 | 729                          | 482                             | 448                                  | 691                                     | 371                        |
| Transmembrane Count  | 1108                | 1105                         | 749                             | 767                                  | 1051                                    | 774                        |
| w/ Func Pred %       | 65.11               | 66.79                        | 77.86                           | 52.07                                | 66.26                                   | 75.3                       |
| Scaffold Count       | 379                 | 216                          | 93                              | 62                                   | 1                                       | 10                         |
| rRNA Count           | 3                   | 3                            | 3                               | 7                                    | 7                                       | 6                          |
| tRNA Count           | 49                  | 51                           | 38                              | 41                                   | 45                                      | 37                         |
| CRISPR Count         | 0                   | 0                            | 1(46)                           | 1(4)                                 | 0                                       | 0                          |
